# Supplementary material
Source: PubMed Central journal article supplement (PMC10441037)
Supplement: NIHMS1895436-supplement-Supplemental_Table_S1.pdf [file NIHMS1895436-supplement-Supplemental_Table_S1.pdf]

Supplemental Table 1. Baseline characteristics in APR+ vs APR- for ZOL group and for placebo group<sup>a</sup>

| Characteristic                | ZOL                |                    |                | Placebo           |                    |                |
|-------------------------------|--------------------|--------------------|----------------|-------------------|--------------------|----------------|
|                               | APR+<br>(n = 1639) | APR-<br>(n = 2223) | <i>p</i> value | APR+<br>(n = 456) | APR-<br>(n = 3396) | <i>p</i> value |
| Age (years)                   | 72.2 ± 4.9         | 73.7 ± 5.5         | <0.0001        | 73.0 ± 5.5        | 73.0 ± 5.4         | 0.98           |
| BMI (kg/m <sup>2</sup> )      | 24.9 ± 4.1         | 25.3 ± 4.5         | 0.003          | 25.2 ± 4.4        | 25.4 ± 4.3         | 0.30           |
| Weight (kg)                   | 59.6 ± 10.8        | 60.1 ± 11.3        | 0.13           | 59.8 ± 11.9       | 60.7 ± 11.2        | 0.11           |
| Asian race                    | 342 (20.9)         | 207 (9.3)          | <0.0001        | 118 (25.9)        | 420 (12.4)         | <0.0001        |
| Femoral neck BMD T-score      | -2.7 ± 0.5         | -2.8 ± 0.5         | 0.002          | -2.7 ± 0.6        | -2.7 ± 0.5         | 0.88           |
| Prevalent vertebral fracture  |                    |                    |                |                   |                    |                |
| None                          | 676 (41.2)         | 776 (34.9)         | 0.0002         | 162 (35.5)        | 1219 (35.9)        | 0.94           |
| 1 fracture                    | 451 (27.5)         | 640 (28.8)         |                | 125 (27.4)        | 947 (27.9)         |                |
| 2+ fractures                  | 512 (31.2)         | 805 (36.2)         |                | 169 (37.1)        | 1229 (36.2)        |                |
| Creatinine clearance (mL/min) | 64.3 ± 17.0        | 62.7 ± 17.5        | 0.005          | 62.8 ± 18.0       | 64.0 ± 17.6        | 0.16           |
| <60 ml/min                    | 709 (43.3)         | 1071 (48.2)        | 0.002          | 213 (46.7)        | 1510 (44.5)        | 0.37           |
| Alkaline phosphatase (IU/L)   | 75.7 ± 22.3        | 78.3 ± 25.7        | 0.0005         | 77.2 ± 24.2       | 76.9 ± 24.7        | 0.69           |
| Active back pain              | 328 (20.0)         | 381 (17.1)         | 0.03           | 115 (25.2)        | 630 (18.5)         | 0.0007         |
| Diabetes                      | 103 (6.3)          | 158 (7.1)          | 0.31           | 27 (5.9)          | 192 (5.6)          | 0.82           |
| Prior bisphosphonate use      | 182 (11.1)         | 381 (17.2)         | <0.0001        | 78 (17.2)         | 478 (14.1)         | 0.08           |
| Current NSAID use             | 972 (59.3)         | 1240 (55.8)        | 0.03           | 274 (60.1)        | 1898 (55.9)        | 0.09           |
| Prior calcitonin use          | 164 (10.0)         | 279 (12.6)         | 0.01           | 44 (9.7)          | 381 (11.3)         | 0.31           |
| Current smoker                | 126 (7.7)          | 217 (9.8)          | 0.02           | 25 (5.5)          | 289 (8.5)          | 0.03           |

APR = acute-phase reaction; BMD = bone mineral density; BMI = body mass index; NSAID = non-steroidal anti-inflammatory drug;  
SD = standard deviation; ZOL = zoledronic acid.

<sup>a</sup> Mean  $\pm$  SD, or *n* (%)
