# Supplementary material
Source: PubMed Central journal article supplement (PMC10441037)
Supplement: NIHMS1895436-supplement-Supplemental_Table_S2.pdf [file NIHMS1895436-supplement-Supplemental_Table_S2.pdf]

Supplemental Table 2. Relative risk of incident fracture in ZOL vs. placebo for those who developed APR and those who did not

| Type of incident fracture       | RR <sup>a</sup> (95% CI) of fracture for ZOL vs. Placebo |                   |                   | <i>p</i> value for interaction |
|---------------------------------|----------------------------------------------------------|-------------------|-------------------|--------------------------------|
|                                 | APR+                                                     | APR-              | All Women         |                                |
| Morphometric vertebral fracture |                                                          |                   |                   |                                |
| Unadjusted                      | 0.19 (0.12, 0.31)                                        | 0.38 (0.30, 0.49) | 0.30 (0.24, 0.38) | 0.01                           |
| Adjusted <sup>b</sup>           | 0.22 (0.14, 0.35)                                        | 0.37 (0.29, 0.47) |                   | 0.05                           |
| Non-vertebral fracture          |                                                          |                   |                   |                                |
| Unadjusted                      | 0.73 (0.51, 1.05)                                        | 0.80 (0.67, 0.96) | 0.75 (0.64, 0.87) | 0.67                           |
| Adjusted <sup>b</sup>           | 0.74 (0.51, 1.07)                                        | 0.78 (0.65, 0.93) |                   | 0.94                           |
| Hip fracture                    |                                                          |                   |                   |                                |
| Unadjusted                      | 0.71 (0.30, 1.70)                                        | 0.65 (0.44, 0.97) | 0.59 (0.42, 0.83) | 0.86                           |
| Adjusted <sup>b</sup>           | 0.79 (0.32, 1.96)                                        | 0.59 (0.39, 0.88) |                   | 0.59                           |

APR = acute-phase reaction; CI = confidence interval; RR = relative risk; ZOL = zoledronic acid.

<sup>a</sup> Odds ratio for vertebral fractures using logistic regression, relative hazard for non-vertebral and hip fractures using Cox proportional hazard models.

<sup>b</sup> Adjusted for race (Asian or non-Asian), age, prior bisphosphonate usage, active back pain, diabetes, femoral neck BMD, number of prevalent vertebral fractures, creatinine clearance, alkaline phosphatase.
